# Supplementary material for: The epigenetic pioneer EGR2 initiates DNA demethylation in differentiating monocytes at both stable and transient binding sites
Source: PubMed Central journal article supplement (PMC7946903; doi:10.1038/s41467-021-21661-y), 2021-03-10
Supplement: 41467_2021_21661_MOESM1_ESM.pdf [file 41467_2021_21661_MOESM1_ESM.pdf]

## Supplementary Information for

### The epigenetic pioneer EGR2 initiates DNA demethylation in differentiating monocytes at both stable and transient binding sites

Karina Mendes,<sup>1,3</sup> Sandra Schmidhofer,<sup>1,4</sup> Julia Minderjahn,<sup>1,5</sup> Dagmar Glatz,<sup>1,6</sup> Claudia Kieseewetter,<sup>1,7</sup> Johanna Raithel,<sup>2</sup> Julia Wimmer,<sup>1,8</sup> Claudia Gebhard,<sup>2</sup> Michael Rehli<sup>1,2,\*</sup>

<sup>1</sup>Department of Internal Medicine III, University Hospital Regensburg, 93053 Regensburg, Germany

<sup>2</sup>Regensburg Centre for Interventional Immunology, University Hospital Regensburg, 93053 Regensburg, Germany

\*Correspondence: michael.rehli@ukr.de

<sup>3</sup>present address: Universidade Católica Portuguesa, Center for Interdisciplinary Research in Health (CIIS), Institute of Health Sciences (ICS), Viseu, Portugal

<sup>4</sup>present address: AstraZeneca, Tinsdaler Weg 183, 22880 Wedel, Deutschland

<sup>5</sup>present address: Sandoz GmbH, Biochemiestraße 10, 6336 Langkampfen, Austria

<sup>6</sup>present address: Chromatin Structure and Cellular Senescence Research Unit, Maisonneuve-Rosemont Hospital Research Centre, Montréal, Quebec, Canada H1T 2M4

<sup>7</sup>present address: Labor Kneissler, Unterer Mühlweg 10, 93133 Burglengenfeld

<sup>8</sup>present address: Deutsches Patent- und Markenamt, 80331 München, Germany

#### Supplement Index:

|                           |            |
|---------------------------|------------|
| Supplementary Figures 1-6 | page 02-09 |
| Supplementary Tables 1-10 | page 10-19 |
| Supplementary References  | page 20    |

## Supplementary Figures &amp; Legends

## Supplementary Figure 1

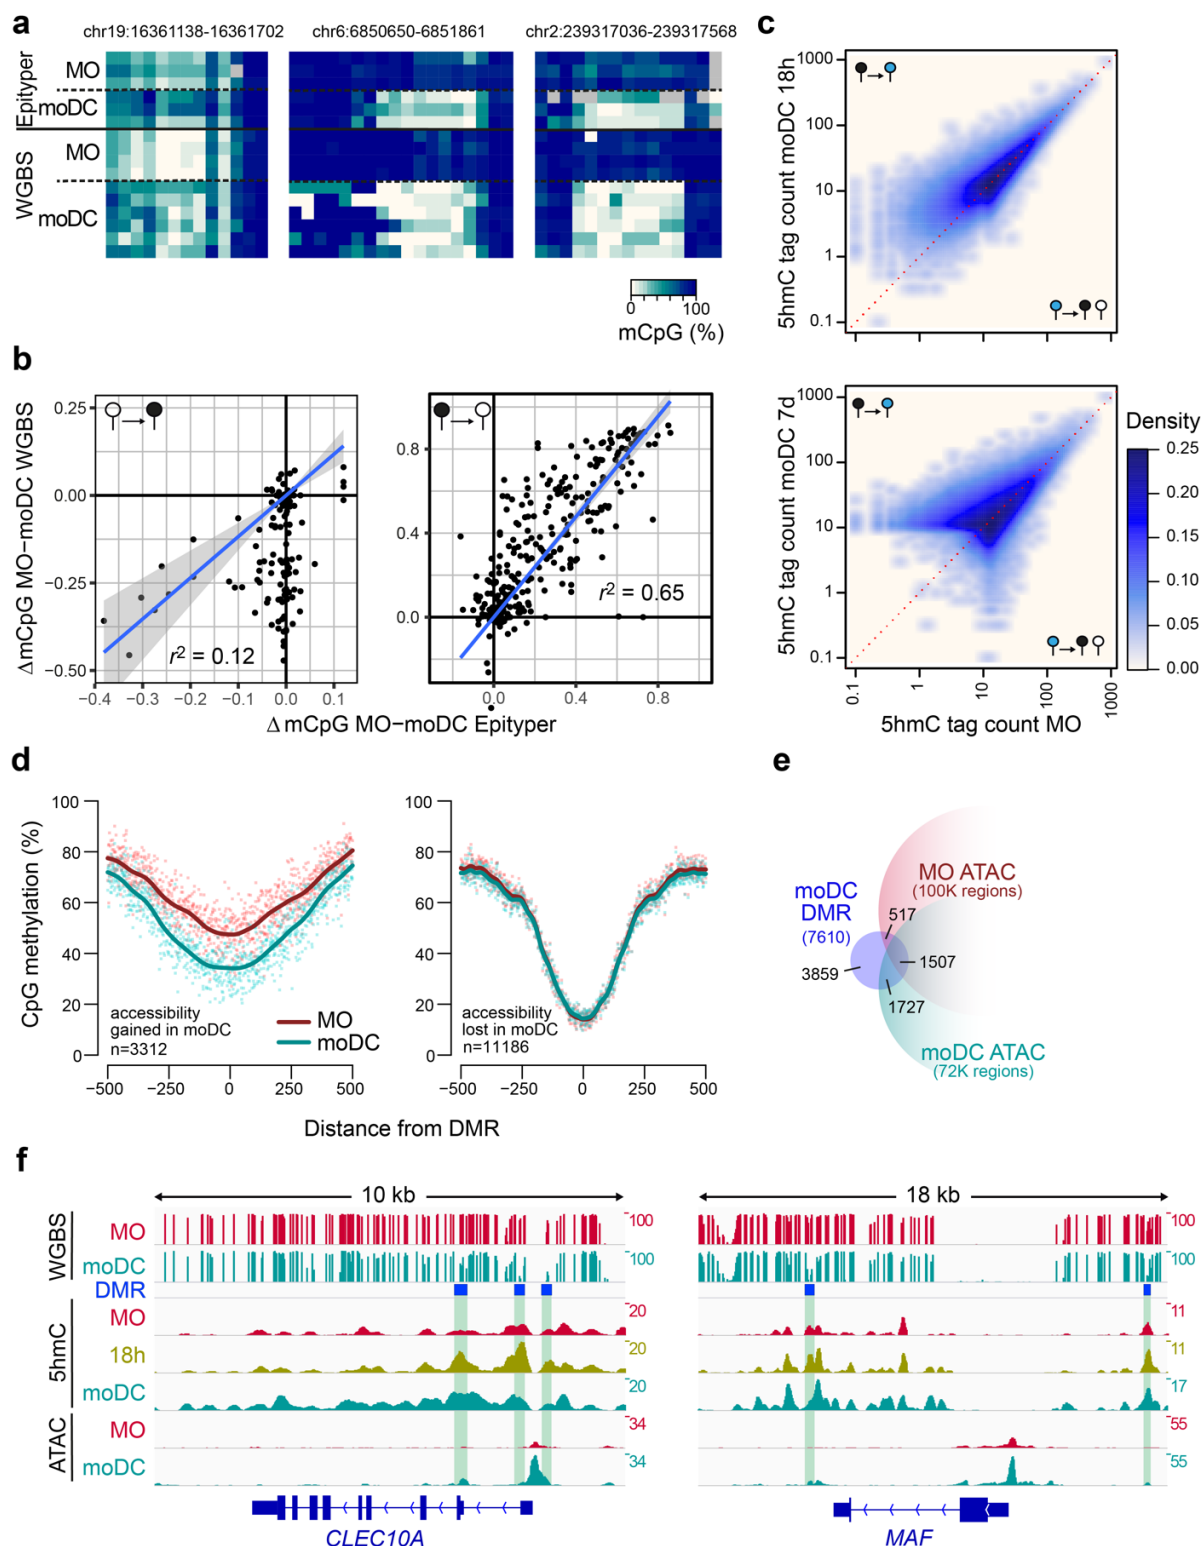

**Comparative analyses of active DNA demethylation events during MO differentiation, Related to Figure 1.** **a** Validation of whole genome bisulfite sequencing (WGBS) data of MO (n=4) and moDC (n=6) was performed using EpiTYPER DNA methylation analysis of matched MO and moDC preparations (n=3) at 38 randomly selected DMR (11 DMR methylated in moDC and 27 demethylated in moDC). Comparisons of individual methylation ratios for both technologies at three representative example regions are shown as a heatmap. Methylation ratios are indicated by coloring (white: no methylation, dark blue: 100% methylation, gray: not detected) with each column representing a single CpG. **b** Scatter plots showing correlations of methylation changes for

all individual CpGs tested between different data sets. Black lollipops indicate 5mC and white lollipops unmethylated 5C. Notably, most demethylation events were independently validated (26/27 regions tested) while only few methylation events were reproducible (2/11). **c** Scatterplots showing the density distribution of 5hmC enrichment of MO compared to moDC at 18h (top panel) or moDC at d7 (bottom panel) across a merged set of 5hmC peaks. Black lollipops indicate 5mC, blue lollipops 5hmC, and white lollipops unmethylated 5C. **d** Genomic distance distribution of averaged DNA methylation ratios centered on ATAC-seq peaks that were either lost or gained during GM-CSF/IL4-driven MO differentiation as described in Figure 1c. **e** Venn diagram showing the number of DMR demethylated in moDC overlapping ATAC-seq peaks that either lost or gained accessibility during GM-CSF/IL4-driven MO differentiation. **f** IGV genome browser tracks of example regions (*CLEC10A* and *MAF* loci) as described in Figure 1h. Highlighted DMR (green boxing) indicate regions demonstrating increased chromatin accessibility and increased 5hmC deposition during differentiation. (a,b,d) Source data are provided as a Source Data file.

## Supplementary Figure 2

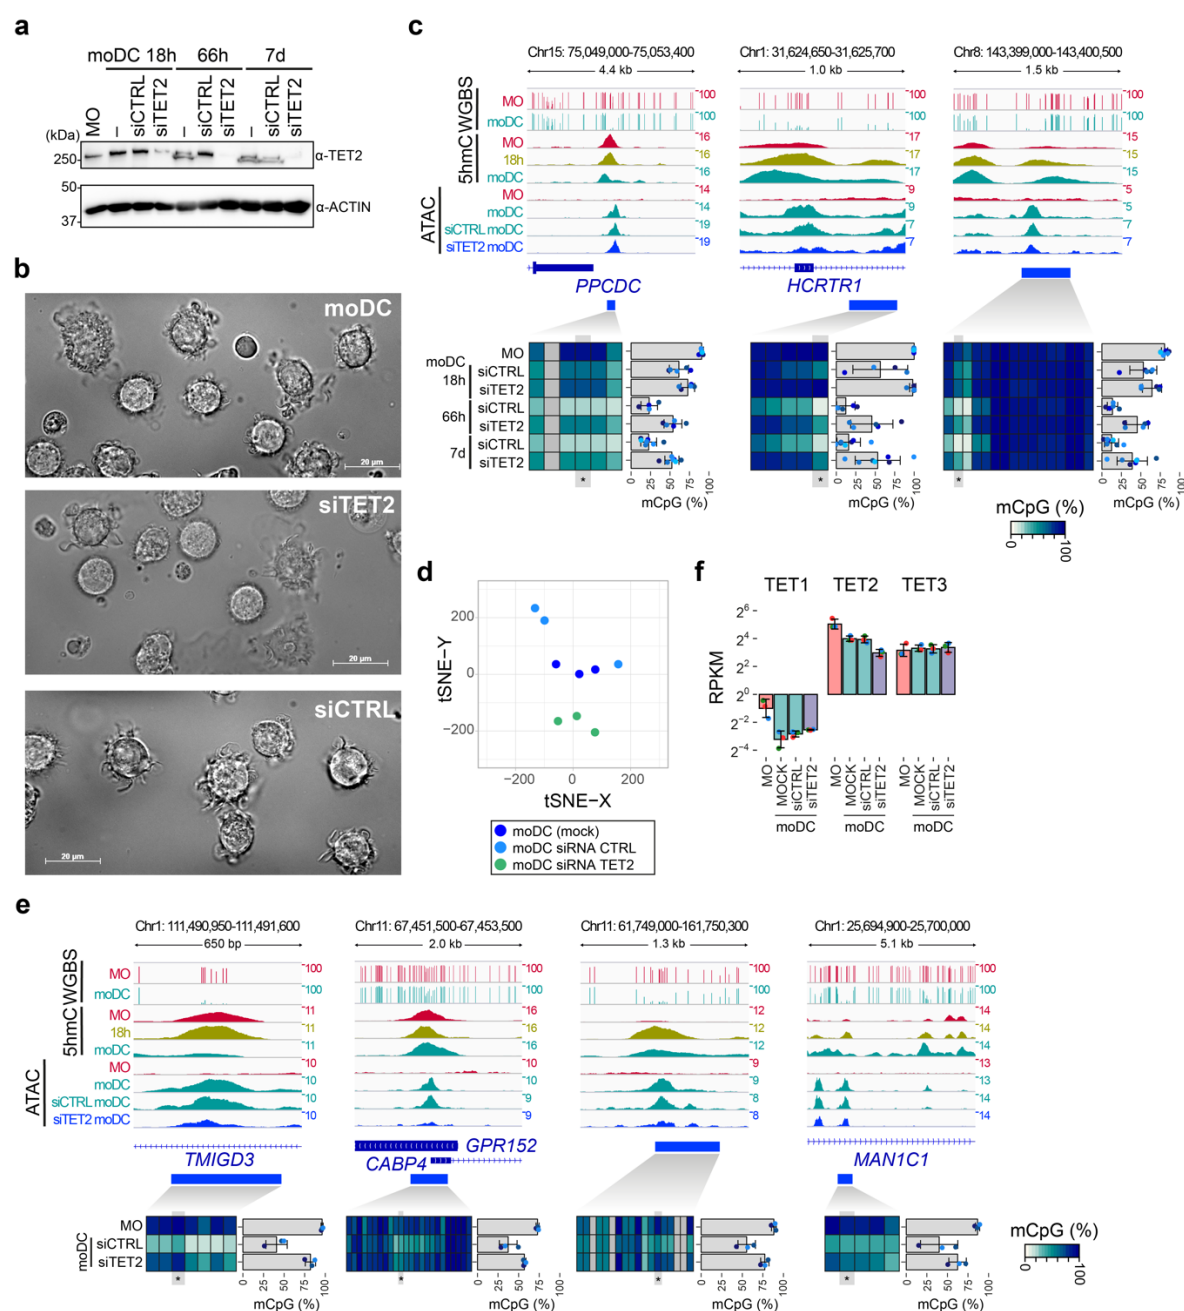

**Effects of TET2 knock-down, Related to Figure 2.** **a** TET2 protein expression levels during GM-CSF/IL4-driven MO differentiation. MO were cultured without transfection or transfected with siCTRL or siTET2 before culture and harvested at the indicated time points (18h, 66h and 7d). Blots were stained with  $\alpha$ -TET2 and  $\alpha$ -ACTIN antibodies (the latter represents the protein loading control). Results are representative of two independent experiments. **b** Light microscopy images of MO either untreated (moDC) or treated with siCTRL or siTET2 and cultured for 7d in the presence of GM-CSF/IL4 (60x magnification, bar represents 20  $\mu$ m). Images are representative of three independent experiments. **c** IGV genome browser tracks for the indicated WGBS, 5hmC and ATAC data sets at regions around example DMRs as well as corresponding DNA methylation ratios as described in Figure 2b. Methylation ratios represent means of  $n=5$  (18h and 66h) or  $n=7$  (MO and 7d) biologically independent experiments  $\pm$  SD. **d** Two-dimensional visualization of the RNA-seq sample distribution of the indicated treatments using tSNE embedding. Replicates of the same treatment are indicated by coloring. **e** IGV genome browser tracks for the indicated WGBS, 5hmC and ATAC data sets at regions showing reduced accessibility upon siRNA-mediated TET2 depletion. Corresponding DNA methylation ratios are shown below each genome browser track as described in Figure 2b. Methylation ratios represent means of  $n=3$  (biologically independent experiments)  $\pm$  SD. **f** Gene expression levels of TET family members in MO and MO either untreated (moDC) or treated with siCTRL or siTET2 and cultured for 7d in the presence of GM-CSF/IL4 as derived from RNA sequencing ( $n=3$  biologically independent experiments). Reads Per Kilobase of transcript, per Million mapped reads (RPKM) were converted from normalized and batch-corrected read counts. Bars represent means  $\pm$  SD, individual data points are shown as colored dots (each color represents a different donor). (a,c-f) Source data are provided as a Source Data file.

## Supplementary Figure 3

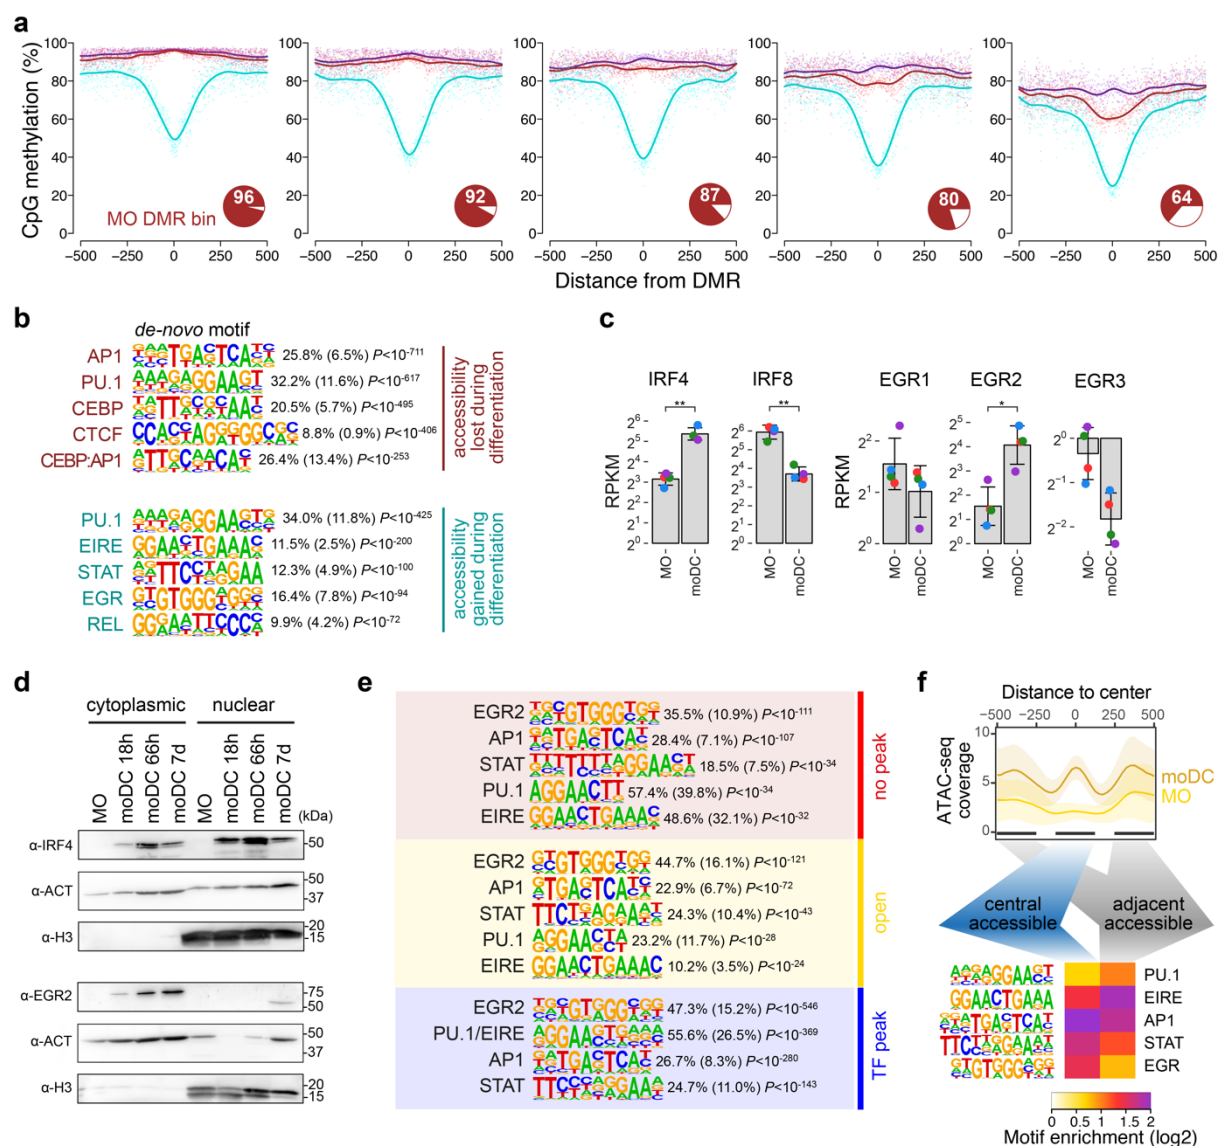

**Candidate TF associated with active DNA demethylation, Related to Figure 3.** **a** Genomic distance distributions of mean methylation ratios in HSPC (purple), MO (red) and moDC (cyan) centered on DMR demethylated in moDC. Pie charts represent the mean methylation level (in red) of DMR quantiles (1.5K each) sorted by their mean methylation ratio in MO. **b** *De novo* identified sequence motifs across MO- and moDC-specific ATAC-peaks that loose (upper panel) or gain (lower panel) chromatin accessibility during differentiation. The fraction of motifs in peaks (background values are in parenthesis) and the significance of motif enrichment (hypergeometric test) are given for the top five motifs corresponding to known motif families. **c** Gene expression levels of candidate TF family members in MO and moDC as derived from RNA sequencing (n=4 biologically independent experiments). Reads Per Kilobase of transcript, per Million mapped reads (RPKM) were converted from normalized and batch-corrected read counts. Bars represent means  $\pm$  SD, individual data points are shown as colored dots (each color represents a different donor). Significance levels correspond to q-values derived from differential gene analyses using *cpq* and *edgeR*. (\*\* $q < 0.01$ ; \* $q < 0.05$ ; glmQLF test and BH correction for multiple testing). **d** IRF4 and EGR2 protein levels during GM-CSF/IL4-driven MO differentiation. MO were cultured for the indicated time periods (18h, 66h and 7d) and cytoplasmic and nuclear extracts were prepared and separated by SDS page. Blots were stained with the indicated antibodies (Actin in H3 represent protein loading controls). Results are representative of two independent experiments. **e** *De novo* identified sequence motifs across moDC-specific DMR in "TF peak", "open" and "no peak" groups as defined in Figure 3c and described above in b. **f** Motif distribution in central accessible DMR and adjacent accessible regions as observed in the "open" group of moDC-specific DMR (as described in Figure 3e). Shaded bands represent the 95% confidence intervals. (a,c,d,f) Source data are provided as a Source Data file.

Supplementary Figure 4

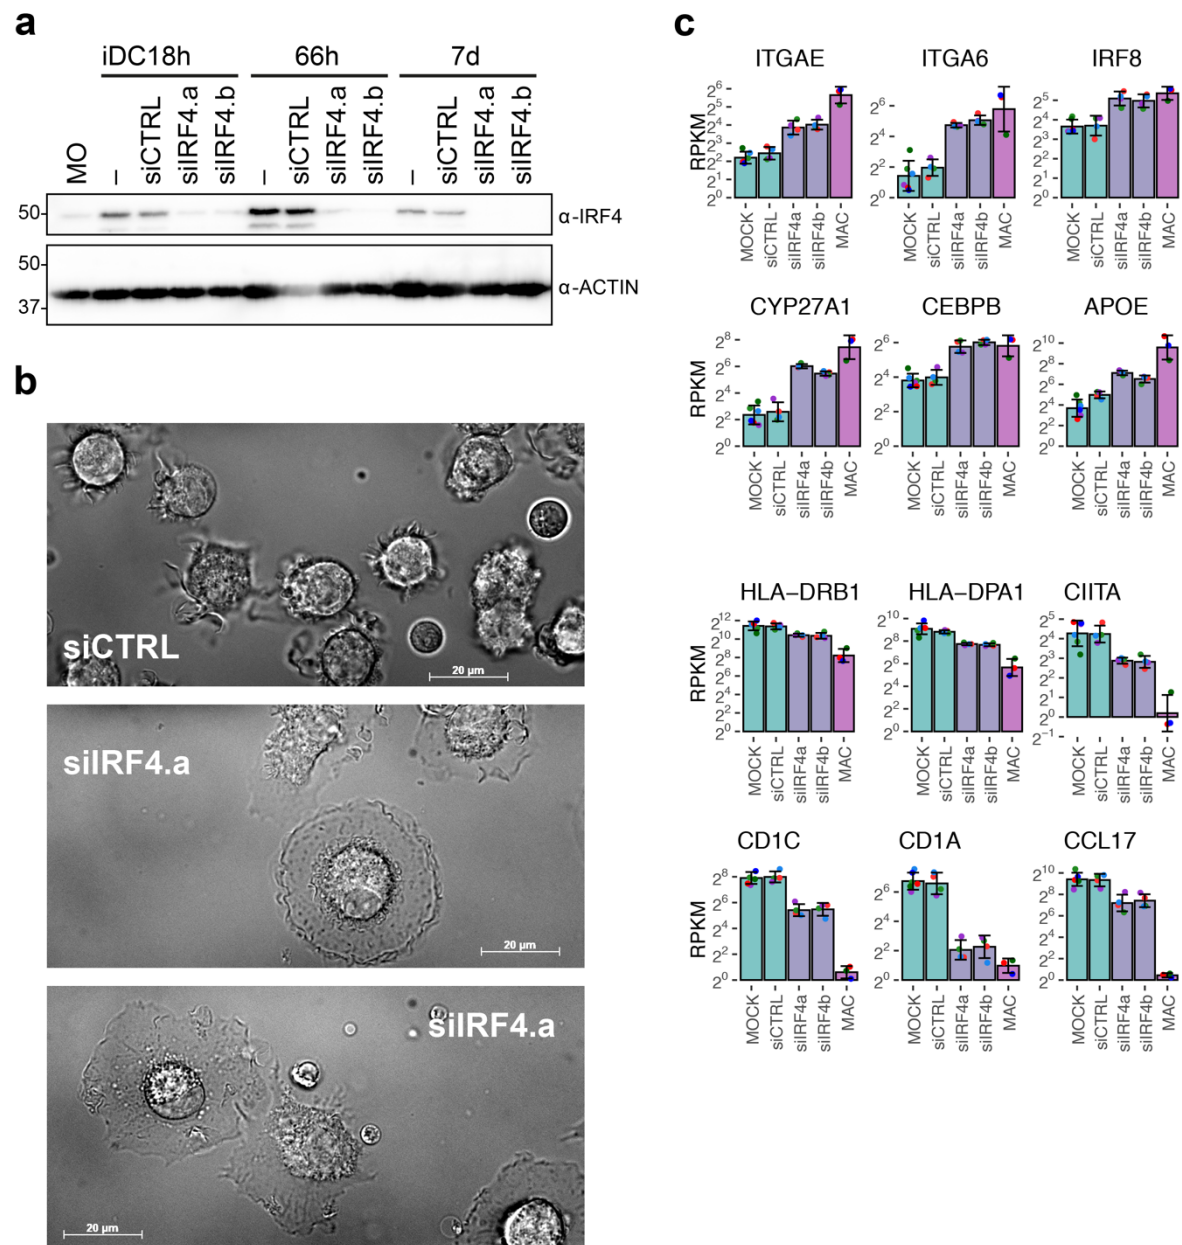

**Effects of IRF4 knock-down, Related to Figure 4.** **a** IRF4 protein expression levels during GM-CSF/IL4-driven MO differentiation. MO were cultured without transfection or transfected with siCTRL or siIRF4 (two different siRNAs) before culture and harvested at the indicated time points (18h, 66h and 7d). Blots were stained with  $\alpha$ -IRF4 and  $\alpha$ -ACTIN antibodies (the latter represents the protein loading control). Results are representative of two independent experiments. **b** Light microscopy images of MO treated with siCTRL or siIRF4.a and cultured for 7d in the presence of GM-CSF/IL4 (60x magnification, bar represents 20  $\mu$ m). Images are representative of three independent experiments. **c** Expression levels of genes differentially regulated (FDR < 0.05) between controls and IRF4 knockdown cells. RPKM values were calculated from normalized and batch-corrected read counts of the corresponding RNA sequencing experiments. Bars represent means  $\pm$  SD, individual data points are shown as colored dots (each color represents a different donor; means of n=6 (MOCK), n=4 (siCTRL, siIRF4.a,b) or n=3 (MAC) biologically independent experiments). (a,c) Source data are provided as a Source Data file.



Supplementary Figure 5

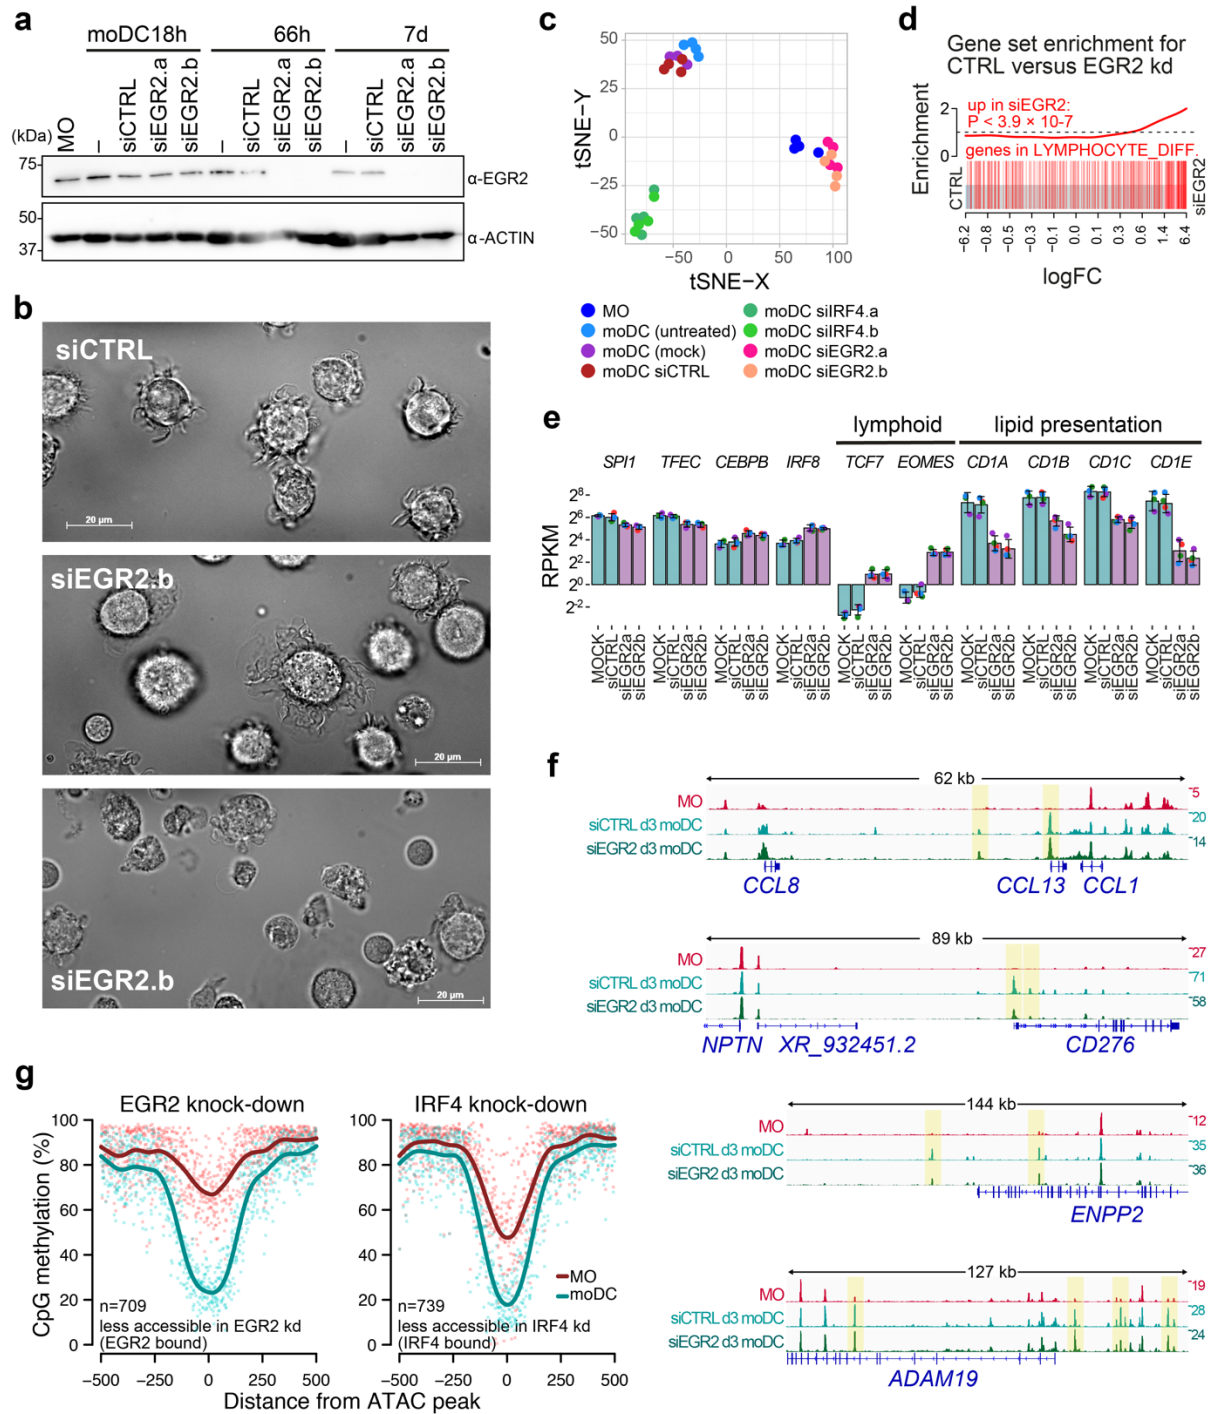

(continued on next page)

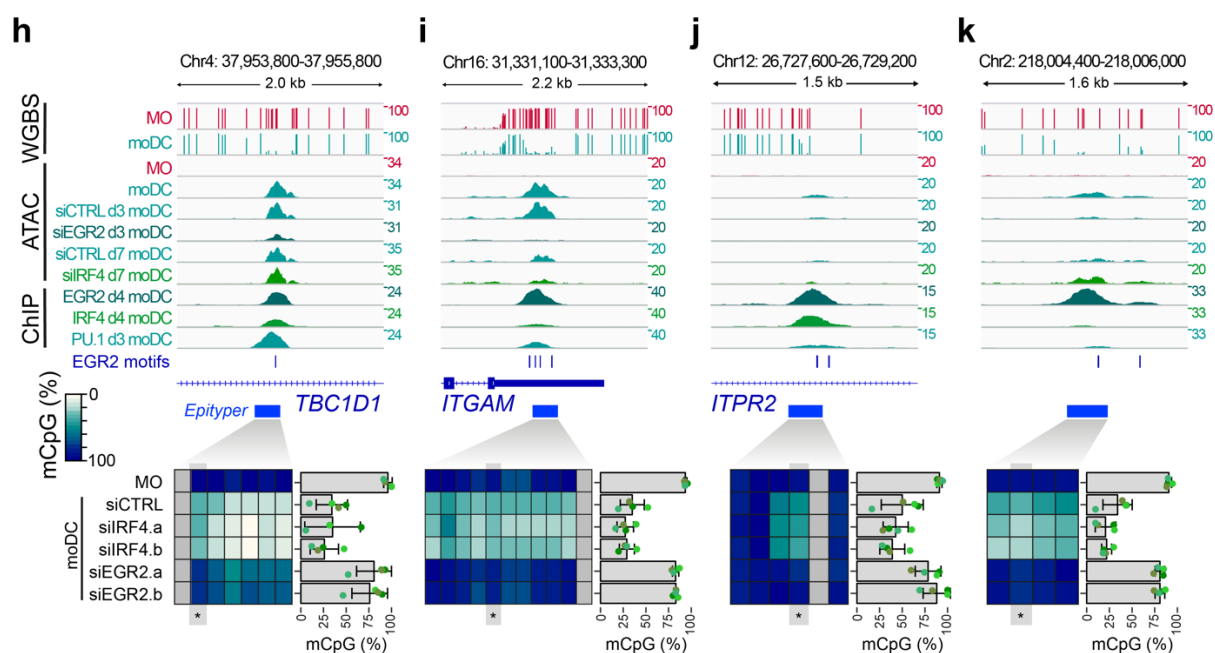

**Effects of EGR2 knock-down, Related to Figure 5. a** EGR2 protein expression levels in MO, moDC and siEGR2- (two different siRNAs) or siCTRL-treated moDC at the indicated time points (18h, 66h and 7d). Blots were stained with  $\alpha$ -EGR2 and  $\alpha$ -ACTIN antibodies (the latter represents the protein loading control). Results are representative of two independent experiments. **b** Light microscopy images of MO treated with siCTRL or siEGR2.b and cultured for 7d in the presence of GM-CSF/IL4 (60x magnification, bar represents 20  $\mu$ m). Images are representative of three independent experiments. **c** Two-dimensional visualization of the RNA-seq sample distribution using tSNE embedding. Replicates of the same treatment are indicated by coloring. **d** Barcode plot presenting gene set enrichment analysis results for GO\_LYMPHOCYTE\_DIFFERENTIATION (MSigDB M18190, top panel) across the logFC ranked gene list of siCTRL- vs siEGR2-treated cells. **e** Comparison of expression levels of TF genes between controls and EGR2 knockdown cells. RPKM values were calculated from normalized and batch-corrected read counts of the corresponding RNA sequencing experiments. Bars represent means  $\pm$  SD, individual data points are shown as colored dots (each color represents a different donor and  $n=3$  (MOCK) or  $n=4$  (other samples) independent experiments). **f** IGV genome browser tracks for the indicated ATAC data sets across example regions of genes that are normally induced in moDC. Chromatin accessibility gains at promoters or putative enhancers in moDC both in siCTRL- and siEGR2-treated cells are highlighted by yellow boxes. **g** Side-by-side comparison of genomic distance distributions of averaged DNA methylation ratios in MO and moDC centered on differentially accessible and TF bound sites (as introduced in Figure 5e-f). **h-k** IGV genome browser tracks for the indicated WGBS, ATAC and ChIP data sets at example regions around binding sites of EGR2, IRF4 or PU.1. Corresponding DNA methylation ratios for the indicated regions are given below. For heatmaps, methylation ratios (representing means of means of  $n=4$  biologically independent experiments) are indicated by coloring (white: no methylation, dark blue: 100% methylation, gray: not detected) with each column representing a single CpG. For each region the data of a single CpG (highlighted and marked by asterisks) is shown. Bars represent means  $\pm$  SD, individual data points are shown as colored dots (each color representing a different donor). (a,c,e,g-k) Source data are provided as a Source Data file.



## Supplementary Figure 6

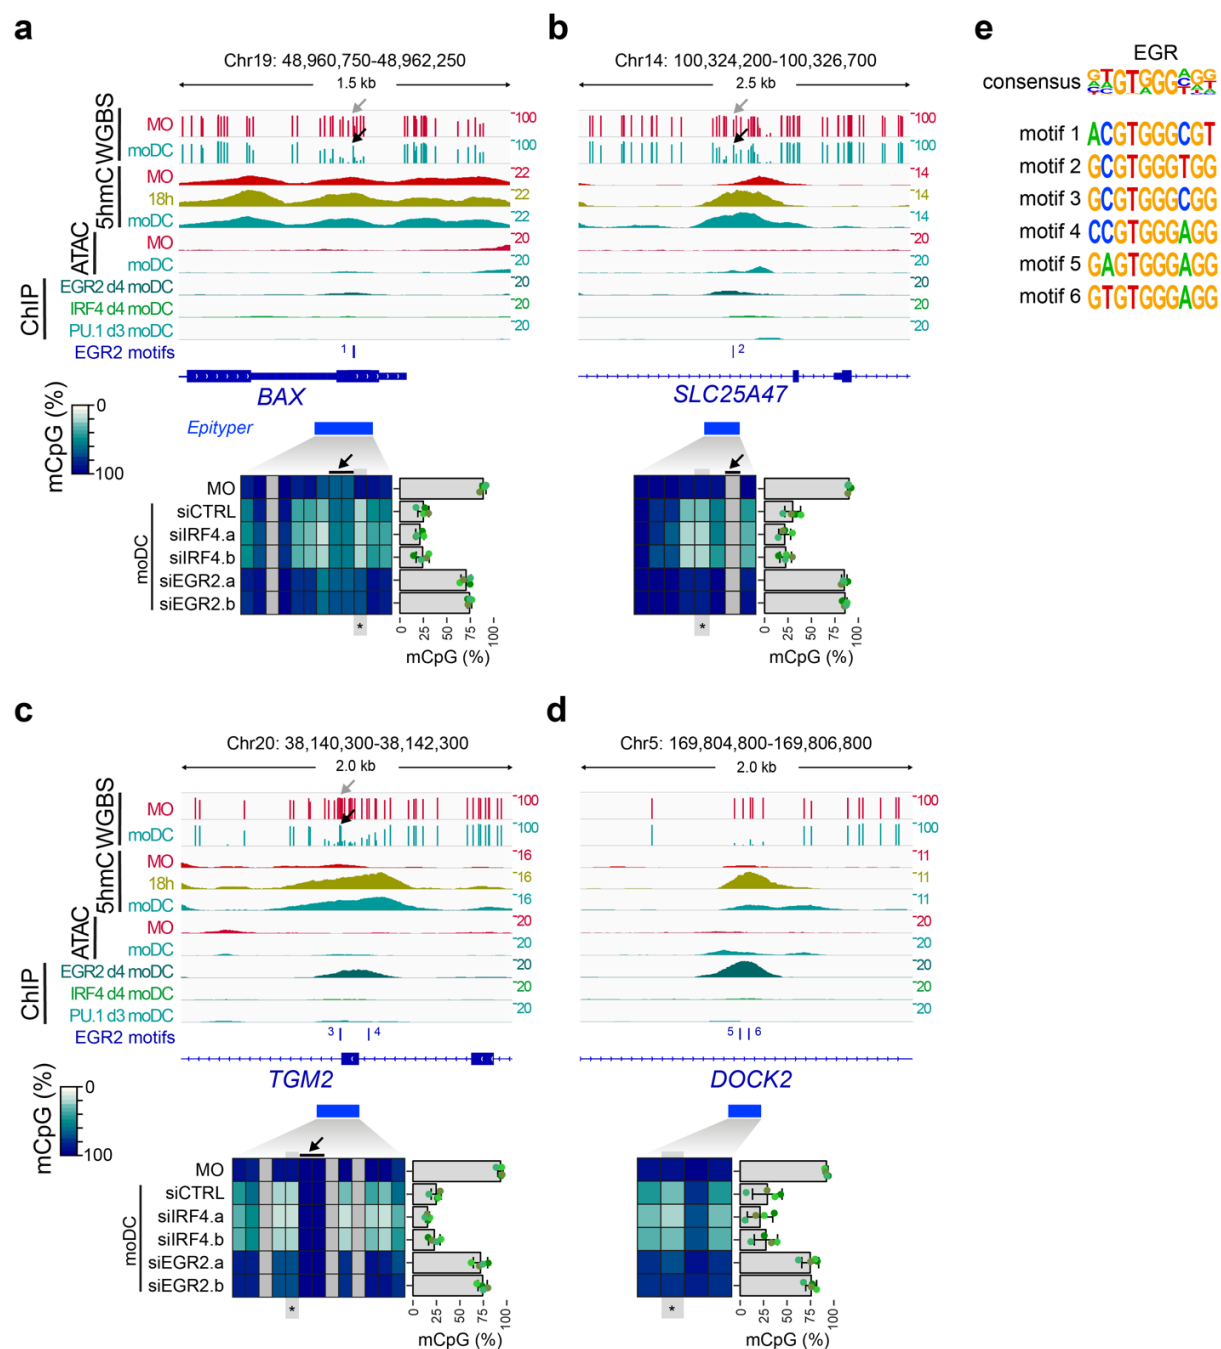

**DNA methylation at largely inaccessible DMR, Related to Figure 6. a-d** IGV genome browser tracks for the indicated WGBS, 5mC, ATAC and ChIP data sets at example DMR with EGR2 consensus motifs. CpGs included in the EGR2 motif that resist demethylation are indicated above the WGBS tracks and DNA methylation heatmaps with arrows. Corresponding DNA methylation ratios (as measured by EpiTYPER) for the indicated regions are given below. For heatmaps, methylation ratios (representing means of  $n=4$  biologically independent experiments) are indicated by coloring (white: no methylation, dark blue: 100% methylation, gray: not detected) with each column representing a single CpG. For each region the data of a single CpG (highlighted and marked by asterisks) is shown. Bars represent means  $\pm$  SD, individual data points are shown as colored dots (each color representing a different donor). **e** Motif sequences for the six EGR2 motifs shown in a-d. The consensus EGR2 motif derived from DMR regions is shown on top. (a-d) Source data are provided as a Source Data file.

**Supplementary Table 1  
Gene blocks for cloning**

| Construct name   | gBlock sequences (5'--3')                                                                                                                                                                                                                                                                                                                                                                                                                                                                                                                                                                                                                                                                                                                                                                                                                                                                                                                                                                                                                                                                                                                                                                                                                                                                                                                                                                                                                                                                                                                                                                                                                                                                                                                                                                                                                                                                                                                                                                                                                                                                                                                                                                                                                                                                                                                                         |
|------------------|-------------------------------------------------------------------------------------------------------------------------------------------------------------------------------------------------------------------------------------------------------------------------------------------------------------------------------------------------------------------------------------------------------------------------------------------------------------------------------------------------------------------------------------------------------------------------------------------------------------------------------------------------------------------------------------------------------------------------------------------------------------------------------------------------------------------------------------------------------------------------------------------------------------------------------------------------------------------------------------------------------------------------------------------------------------------------------------------------------------------------------------------------------------------------------------------------------------------------------------------------------------------------------------------------------------------------------------------------------------------------------------------------------------------------------------------------------------------------------------------------------------------------------------------------------------------------------------------------------------------------------------------------------------------------------------------------------------------------------------------------------------------------------------------------------------------------------------------------------------------------------------------------------------------------------------------------------------------------------------------------------------------------------------------------------------------------------------------------------------------------------------------------------------------------------------------------------------------------------------------------------------------------------------------------------------------------------------------------------------------|
| pEF6-3xFLAG-EGR2 | <p><b>Fragment 1:</b><br/>                     TATAGGGAGACCCCAAGCTGGCTAGGTAAGCTTGGTACCGAGCTCGGATCCGCCACCATGGACTACAAAGACCATGAC<br/>                     GGTGATTATAAAGATCATGACATCGATTACAAGGATGACGATGACAAAATGACCGCCAAAGGCCGTAGACAAAATCCC<br/>                     AGTAACTCTCAGTGGTTTTGTGCACCAGCTGTCTGACAACATCTACCCGGTGGAGGACCTCGCCGCCACGTCCGGTGA<br/>                     CCATCTTTCCCAATGCCGAAGTGGGAGGCCCCCTTTGACCAGATGAACGGAGTGGCCGGAGATGGCATGATCAACATT<br/>                     GACATGACTGGAGAGAAGAGGTCGTTGGATCTCCCATATCCAGCAGCTTTGCTCCCGTCTCTGCACCTAGAAACCA<br/>                     GACCTTCACTTACATGGGCAAGTCTCCATTGACCCTCAGTACCCCTGGTCCAGCTGCTACCCAGAAGGCATAATGA<br/>                     ATATTGTGAGTGCAGGCATCTTGAAGGGGTCACTTCCCAGCTTCAACCACAGCTCATCCAGGCTCACCTCTGCC<br/>                     TCCCCAACCCACTGGCCACAGGACCCCTGGGTGTGTGCACCATGTCCCAGACCCAGCCTGACCTGGACCACCTGTA<br/>                     CTCTCCGCCACCGCTCCTCTCTTATTTGGCTGTGCAGGAGACCTTACCAGGACCTTCTGGCTTCTGTCTGAC<br/>                     CAGCCACCACCTCCACCTCTCTCTGCTTCCACCCACCTCCTTCTATCCATCCCCAACGCCAGCCAGCCGAC<br/>                     CCAGTCTCTTCCAATGATCCCAGACTATCCTGGATTCTTCCATCTCAGTGCCAGAGACCTACATGGTACAGC<br/>                     T</p> <p><b>Fragment 2:</b><br/>                     AGACTATCCTGGATTCTTTCCATCTCAGTGCCAGAGAGACCTACATGGTACAGCTGGCCAGACCCTAAGCCCTTTC<br/>                     CCTGCCACTGGACACCCCTGCGGGTGGCCCTCCACTCCTCCTCTTACAATCCGTAACCTTTACCCTGGGGGGC<br/>                     CCCAGTGTGGGGTGACCGGACCAGGGCCAGTGGAGGCAGCGAGGGACCCCGGCTGCCTGGTAGCAGCTCAGCAGC<br/>                     AGCAGCAGCCGCTGCCGAGCTGCCTATAACCCACACCACCTGCCACTGCGGCCATTCTGAGGCCCTCGCAAGTACC<br/>                     CCAACAGACCCAGCAAGACGCGGTGCACGAGAGGCCCTACCCGTGCCAGCAGAAGGCTGCGACCGCGGTTCTCC<br/>                     CGCTCTGACGAGCTGACACGGCAGATCCGAATCCACACTGGGCATAAGCCCTTCCAGTGTCCGATGTGCATGCCGAA<br/>                     CTTTACGCCGAGTACCACCTCACCACCCATATCCGCACCCACACCGGTGAGAAGCCCTTCCGCTGTGACTACTGTG<br/>                     GCCGAAAGTTGCCCGGAGTGTGAGAGGAAGCGCCACCAAGATCCACTGAGACAGAAAGAGCGGAAAGCAGT<br/>                     GCCCCCTCTGCATCGGTGCCAGCCCTCTACAGCCTCTGTCTGGGGGCGTGCAGCCTGGGGGTACCTGTGCAG<br/>                     CAGTAACAGCAGCAGTCTTGGCGGAGGGCCGCTCGCCCTTGTCTCTCGGACCCGGACACCTTGATAATCTAGAG<br/>                     GGCCCGGTTTGAAGTAAGCCTATCCCTAACCTCTCTCT</p>             |
| pEF6-3xFLAG-NAB2 | <p>TATAGGGAGACCCCAAGCTGGCTAGGTAAGCTTGGTACCGAGCTCGGATCCGCCACCATGGACTACAAAGACCATGAC<br/>                     GGTGATTATAAAGATCATGACATCGATTACAAGGATGACGATGACAAAATGCATAGGGCTCCAGCCGACTGCTGA<br/>                     ACAGCCTCCCGGGGGAGGCGACAGTGAAGAAGAACTTGCAACCGAGATTGAAACCCAGTGCCTCCGCGCCATGGCCC<br/>                     TGCCCGGACTCTGGGAGAGTTGCAACTTTACCCGCTGTGCAACGAGCAATCTGTTCCTACTATGAACCGTTT<br/>                     ATCCAGCAGGGTGGAGACGATGTTACGAGTGTGCGAAGCAGGTGAGGAAGAATTTCTCGAGATTATGGCGTTGT<br/>                     AGTATGGCAACGAAAGCCCTTACGCTGCGAAGGCTTTCAGAAAGCATTGCGAGAATGGGCGACCACCCGGGTTTGT<br/>                     TTAGTCAGCCCGTACCTGCTGTACTGTCTCTAGTATTTCCCTTTTCAAGATTAGCGAGACGGCTGGTACGCGCAAG<br/>                     GGATCAATGAGTAATGGGCATGGCTCTCCCGGAGAGAAGGAGGTAGCGCGGGAGCTTTTCTCCAAAGTCCCGTT<br/>                     GGAACCTGGTGAAAAGTTGTCTCCACTTCCAGGTGGGCCGGGTGCCGGAGATCCAAGAATCTGGCCAGGACGCTCCA<br/>                     CACCAGAAAGTGTGTCGGGGCGGTTGGCGAAGAGGAAGCGGTTTACCACCATTCTCCCTCCAGCTGGTGGAGGT<br/>                     GTACCTGAAGGCACCGGAGCCGGCGGGCTGGCGGCAGGTGGAACCGGTTGGTCCCGATCGCTTGGAGCCTGAAAT<br/>                     GGTCCGGATGGTTGTGAACTGTGAAACGGATCTTTCGATCTTTCCCAAGGGGTGATGCGGGGAAATCACTAGTT<br/>                     TGTGAAGCTGAACAAGAACTCGTAGATCTGTGGCCATATATTCGAGATGGATGATAACGATTCTCAAAAGGAG<br/>                     GAGGAAATCAGAAATACCTATAATTTACGGCCGATTTCGACTCTAAGCGCGGGAGGAAAGCAGCTGTATTGCA<br/>                     TGAACCTACTATTAACGAAGCCCGCCACAATTTGATGCGGGATAACACCTTGTCTGTCGCGAGAGTCAACTCT<br/>                     TCAGTTTGAGCCCGCAGGTTCGCTCGAGAGTCAACCTACTGTCTTCACTCAAAGGCTCCAGACTGCAACCCAGA<br/>                     CTCGGGGGGCCCCACTCAAAAAGCTTAAAGCAGGAGGTGGGGGAACAATCTACCCCGAGATCCAGCAACCTCCTCC<br/>                     CGTCCAGAGAGCTATGTCCCCCATATCGCCGAGTCTTGAAGGAGATAGCGCTCCCTCAGTGGTGTGCTCTGG<br/>                     ACGGACACCTTACGGCAGTGGGGTCTGTCTCTGACTTACTCTCCGCCAGCAGACCTGCCACTGGCGCTGCCCGCT<br/>                     CATGGCCTGTGGAGTAGACACATTTCTCCAAACACTTATGATGAGGGATTGCGGATGCGGCTGGCTTGTCTCCCA<br/>                     CGACAGGGTGGGGCGGCTCTCACCGTGCCTACCAGCGAAACCCCGCTGGCTGAAATTTGAAGAAGCCCTCTCGATA<br/>                     GGTGCCCGCGCCCGCCACACCTGCGCTTGTGAGGGTAGGCGATCCAGCGTAAAGGTTGAAGCAGAGGCTCC<br/>                     AGACAATGATCTAGAGGGCCCGGTTTGAAGTAAGCCTATCCCTAACCTCTCTCT</p> |
| pEF6-3xFLAG-IRF4 | <p>ATTGCGGATCCGCCACCATGGACTACAAAGACCATGACGGTGATTATAAAGATCATGACATCGATTACAAGGATGAC<br/>                     GATGACAAAATGAACCTGGAGGGCGCGGCCGAGGCGGAGAGTTCGCGCATGAGCGCGGTGAGCTGCGGCAACGGGAA<br/>                     GCTCCCGCAGTGGTGTATCGACAGATCGACAGCGGCAAGTACCCCGGCTGGTGTGGGAGAACGAGGAGAAGAGCA<br/>                     TCTTCCGCATCCCTGGAAGCAGCGGGCAAGCAGGACTACAACCGCAGGAGGACCGCGCTCTTCAAGGCTTGG<br/>                     GCACTGTTTAAAGGAAAGTCCGAGAAGGCATCGACAAGCCGACCCCTCCACCTGGAAGACGCGCTGCGGTGCCA<br/>                     TTTGAACAAGAGCAATGACTTTGAGGAAGTGGTTGAGCGGAGCCAGCTGGACATCTCAGACCCGTACAAAGTGTACA<br/>                     GGATTTCTTGGAGGAGCCAAAAGAGGCAAGCAGCTACCCCTGGAGGACCCGAGATGTCATGAGCCACCC<br/>                     TACACCATGACAACGCCTTACCCCTCGCTCCCAGCCAGCAGGTTCACAACTACATGATGCCACCCCTCGACCGAAG<br/>                     CTGGAGGGACTACGTCGCGATAGCCACACCCGAAATCCCGTACCAATGTCCCATGACGTTTGGACCCCGCGGCC<br/>                     ACCACTGGCAAGGCCAGCTTGTGAAAATGGTTGCCAGGTGACAGGAACCTTTTATGCTTGTGCCACCCCTGACTCC<br/>                     CAGGCTCCCGAGTCCCCACAGAGCCAAAGCATAAGGCTTCCCGAAGCCTTGGCGTCTCAGACTCCCGGCTGCACAT<br/>                     CTGCTGTACTACCGGAAATCCCTGTAAGGAGCTGACCAGCTCCAGCCCGAGGGCTGCCGGATCTCCCATGGAC<br/>                     ATACGTATGACGCCAGCAACCTGGACAGGTCCTGTTCCCTACCCAGAGGACAATGGCCAGAGGAAAACATTGAG<br/>                     AAGCTGCTGAGCCACCTGGAGAGGGCGTGGTCTCTGGATGCCCCCGACGGCTCTATGCGAAAAGACTGTGCCA<br/>                     GAGCAGGATCTACTGGGACGGGCCCTGGCGCTGTGCAACGACCGGCCAAACAACCTGGAGAGAGCAGCAGCTGCA<br/>                     AGCTCTTTGACACACAGCAGTCTTGTGACAGCTGCAAGCCTTGTCTCACACCGGCCCTCCCTGCCAAGATTCCAG<br/>                     GTGACTCTATGCTTTGGAGAGGAGTTTCCAGACCTCAGAGGCAAGAAAGCTCATCACAGCTCAGTAGAACCTCT<br/>                     GCTAGCCAGACAATAATATTTTGTCTCAACAAAACAGTGGACATTTCTGAGGGGCTACGATTTACCAGAACACA<br/>                     TCAGCAATCCAGAAGATTACCACAGATCTATCCGCAATTCTCTATTCAAGAATGATAATCTAGAGTCAAT</p>                                                                                                                                                                                                                                                                                                                                                                                                    |
| pEF6-3xFLAG-PU.1 | Sequence published in <sup>1</sup>                                                                                                                                                                                                                                                                                                                                                                                                                                                                                                                                                                                                                                                                                                                                                                                                                                                                                                                                                                                                                                                                                                                                                                                                                                                                                                                                                                                                                                                                                                                                                                                                                                                                                                                                                                                                                                                                                                                                                                                                                                                                                                                                                                                                                                                                                                                                |

**Supplementary Table 2**  
**siRNAs sequences**

| siRNA           | Strand    | Sequence (5'--3') <sup>1</sup> |
|-----------------|-----------|--------------------------------|
| siCTRL          | Sense     | cuuAcGcuGAGuAcuucGAdTsdT       |
|                 | Antisense | UCGAAGuACUcAGCGuAAGdTsdT       |
| siTET2_1212     | Sense     | accucAGGGcAGAUcAAuudTsdT       |
|                 | Antisense | AAUUGAUCUGCCCUGAGGUdTsdT       |
| siEGR2_1132 (a) | Sense     | cucuAcAAuccGuaAcuuudTsdT       |
|                 | Antisense | AAAGUuACGGAUUGuAGAGdTsdT       |
| siEGR2_2665 (b) | Sense     | guAAAuGGGuGccuuAuudTsdT        |
|                 | Antisense | AAuAAGGcAACCCAUUuACdTsdT       |
| siIRF4_2931 (a) | Sense     | caGGAuAuuuAcuauuAcudTsdT       |
|                 | Antisense | AGuAAuAGuAAuAUCCUGdTsdT        |
| siIRF4_2384 (b) | Sense     | uguccuAcAAucuaGuAAudTsdT       |
|                 | Antisense | AUuACuAGAUUGuAGGAcAdTsdT       |

<sup>1</sup>Chemical modification pattern:

A, G, U, C: RNA Nucleotide

a, g, u, c: 2'-O-Methyl-Nucleotide

dT: desoxy-T residue

s: Phosphorothioate

**Supplementary Table 3  
EpiTYPER Primers**

| Amplicon            | Primer Sequence (5'--3')                     |                                                                    | Genomic location<br>(GRCh38/hg38) |
|---------------------|----------------------------------------------|--------------------------------------------------------------------|-----------------------------------|
|                     | Forward                                      | Reverse                                                            |                                   |
| CCL13 (Fig. 2d)     | AGGAAGAGAGTTTGTGGTTTG<br>AATAGTTAGAAGGA      | CAGTAATACGACTCACTATAGGGAGAAGGCT<br>CAACAAACACAAAACTACAAAA          | chr17:34356259-34356559           |
| RAB15 (Fig. 2d)     | AGGAAGAGAGTGGTAATTAGG<br>CTAGAAGGATAATGGTTAA | CAGTAATACGACTCACTATAGGGAGAAGGCT<br>TCTCCTCTAACACAAACACAACTC        | chr14:64965677-64965967           |
| USP20 (Fig. 2d)     | AGGAAGAGAGGGAATTTTGTG<br>ATTTTTAGGGTGG       | CAGTAATACGACTCACTATAGGGAGAAGGCT<br>AAAACCACCATCCTCTAACTCTC         | chr9:129839252-129839471          |
| PPCDC (Fig. S2e)    | AGGAAGAGAGGGTATTTTGTG<br>GTTGATTTTTTTGG      | CAGTAATACGACTCACTATAGGGAGAAGGCT<br>ACCAAATAATATTAACCTCCTAACCTCAA   | chr15:75051084-75051292           |
| HCRTR1 (Fig. S2e)   | AGGAAGAGAGTTTGTAGATT<br>AGTGAGTGAGTGAAGG     | CAGTAATACGACTCACTATAGGGAGAAGGCT<br>CCAAAAAACAACCCCTAAAAATTC        | chr1:31625344-31625648            |
| (Fig. S2e)          | AGGAAGAGAGGGGTGATGTAG<br>GGGTGAATTTTATT      | CAGTAATACGACTCACTATAGGGAGAAGGCT<br>AACAAACACCTACCCAAAAACCC         | chr8:143399602-143400034          |
| TMIGD3 (Fig. S2f)   | AGGAAGAGAGTTTGTGTTGTT<br>TATTAATTTTGGAGGTTTA | CAGTAATACGACTCACTATAGGGAGAAGGCT<br>CCTAAAAATAATTCATAATCCAACTTT     | chr1:111491097-111491464          |
| CABP4 (Fig. S2f)    | AGGAAGAGAGTGTTTTAGAAG<br>TTTAGGTAGATGATTAGGT | CAGTAATACGACTCACTATAGGGAGAAGGCT<br>CTCCTTAAACTACCAACCAATAAATAATA   | chr11:67452163-67452604           |
| (Fig. S2f)          | AGGAAGAGAGGGGGAGGGGTA<br>GTTAATGTTTGAGT      | CAGTAATACGACTCACTATAGGGAGAAGGCT<br>AAAAAACTAATCTATAACTAATCCCAAA    | chr11:61749586-61750085           |
| MAN1C1 (Fig. S2f)   | AGGAAGAGAGTTTATTAGTA<br>TAAAGGGGTTTGTGTTTT   | CAGTAATACGACTCACTATAGGGAGAAGGCT<br>TCCAAATAACCTAATAATCTAAAATTCCTAA | chr1:25695856-25696293            |
| (Fig. 5f)           | AGGAAGAGAGTTTGTGGGTGT<br>TTGGGTTTTTTTAT      | CAGTAATACGACTCACTATAGGGAGAAGGCT<br>ATTCCAAAATTTTATCCTCTTCAAATATCA  | chr2:111239165-111239537          |
| (Fig. 5g)           | AGGAAGAGAGAGAAGTAAATA<br>AATGTTGAGAATGTGTTAG | CAGTAATACGACTCACTATAGGGAGAAGGCT<br>TCCAAACTCCATACAATAAAAAATAC      | chr8:8949947-8950168              |
| (Fig. 5h)           | AGGAAGAGAGTGGGTTTTGGA<br>ATTTTTATTATTGGG     | CAGTAATACGACTCACTATAGGGAGAAGGCT<br>AAACTCACATAAATCCATCTCCTCC       | chr10:75070419-75070720           |
| (Fig. 5i)           | AGGAAGAGAGGGGTAGGATAG<br>TGTATTGTAGTGAAGT    | CAGTAATACGACTCACTATAGGGAGAAGGCT<br>CCTTAATAATCAAAAAATAACAACAAAAAC  | chr14:103889639-103889892         |
| TBC1D1 (Fig. S5e)   | AGGAAGAGAGGTTATAGGTAG<br>GTTGAGGTTAGATTTGGAA | CAGTAATACGACTCACTATAGGGAGAAGGCT<br>AAATCCCATCAAAATTTCAATAAATC      | chr4:37954547-37954793            |
| ITGAM (Fig. S5f)    | AGGAAGAGAGATTTTTTAGTG<br>GGTATTTTTATTGGGTATT | CAGTAATACGACTCACTATAGGGAGAAGGCT<br>AAAAAAAACCTAACTCCCTTATAC        | chr16:31332112-31332381           |
| ITPR2 (Fig. S5g)    | AGGAAGAGAGTGAGTAAGGGG<br>TAGGAAGGTTATTTTT    | CAGTAATACGACTCACTATAGGGAGAAGGCT<br>AACTTTAAAACCCAAAACCTTTATACCTCA  | chr12:26728155-26728400           |
| (Fig. S5h)          | AGGAAGAGAGTGTAGGTTGT<br>TTTTGTTTTTTGATAAGTT  | CAGTAATACGACTCACTATAGGGAGAAGGCT<br>AAATCCCTACTTCCATTCACAATC        | chr2:218005061-218005375          |
| BAX (Fig. S6a)      | AGGAAGAGAGTTGGGGTTTT<br>AGTTTTATTTTTTTT      | CAGTAATACGACTCACTATAGGGAGAAGGCT<br>ACCTAAATCCAACCTCTTAATACCC       | chr19:48961384-48961645           |
| SLC25A47 (Fig. S6b) | AGGAAGAGAGTGGAGGGTTTG<br>TTTGTGAGTTAGG       | CAGTAATACGACTCACTATAGGGAGAAGGCT<br>ACCTATTTCCCTCTAACTTCCCTATA      | chr14:100325124-100325387         |
| TGM2 (Fig. S6c)     | AGGAAGAGAGTAGGAATTTTT<br>ATTGTTGGGTGGAGT     | CAGTAATACGACTCACTATAGGGAGAAGGCT<br>TAAAATATAAATAAAAATCCCCACCCTTCT  | chr20:38141132-38141388           |
| DOCK2 (Fig. S6d)    | AGGAAGAGAGTGGTGAGAAGA<br>GTTGTTTGTGTT        | CAGTAATACGACTCACTATAGGGAGAAGGCT<br>AATTAATCCCAATCAAAATTCATTATA     | chr5:169805716-169805911          |

**Supplementary Table 4**  
**5hmC capture-sequencing data generated in this study**  
**(primary samples, accession IDs: EGAD00001006603, E-MTAB-9928)**

| Cell type | Sample       | Donor   | Total reads <sup>1</sup> | FRIP (%) <sup>2</sup> | Peaks <sup>3</sup> |
|-----------|--------------|---------|--------------------------|-----------------------|--------------------|
| MO        | 5hmC capture | donor A | 25546492                 | 50.74                 | 113739             |
| moDC, 18h | 5hmC capture | donor A | 20838968                 | 52.31                 | 135896             |
| moDC, 7d  | 5hmC capture | donor A | 22608535                 | 55.34                 | 146134             |
| MO        | input        | donor A | 21158002                 | –                     | –                  |
| moDC, 18h | input        | donor A | 27016412                 | –                     | –                  |
| MO        | 5hmC capture | donor B | 48853424                 | 46.54                 | 90292              |
| moDC, 18h | 5hmC capture | donor B | 23159298                 | 46.11                 | 49824              |
| moDC, 7d  | 5hmC capture | donor B | 21878582                 | 50.84                 | 136447             |
| MO        | input        | donor B | 30130040                 | –                     | –                  |
| moDC, 18h | input        | donor B | 20176298                 | –                     | –                  |

<sup>1</sup>Unique reads after mapping to human reference genome GRCh38

<sup>2</sup>Fraction of reads in peaks (FRIP), determined by running HOMER's findPeaks program in "histone" mode using default parameters and the combined donor-matched background (input)

<sup>3</sup>Number of peaks (determined by HOMER's findPeaks program in "factor" mode with parameters "-tbp 1 -fdr 0.00001" and the combined donor-matched background (input))



**Supplementary Table 5**  
**ChIP-sequencing data generated in this study**  
**(primary samples, accession IDs: EGAD00001006602, E-MTAB-9927)**

| Cell type | Sample                     | IP        | Donor   | Total reads <sup>1</sup> | FRIP (%) <sup>2</sup> | Peaks <sup>3</sup> |
|-----------|----------------------------|-----------|---------|--------------------------|-----------------------|--------------------|
| MO        | freshly isolated           | PU.1 ChIP | donor A | 24524025                 | 24.68                 | 76074              |
| moDC, 18h | 18h IL4/GM-CSF             | PU.1 ChIP | donor A | 19710693                 | 31.52                 | 95470              |
| moDC, 7d  | 7d IL4/GM-CSF              | PU.1 ChIP | donor A | 18562882                 | 15.19                 | 62848              |
| moDC, 18h | 18h IL4/GM-CSF             | Input     | donor A | 27897594                 | –                     | –                  |
| MO        | freshly isolated           | PU.1 ChIP | donor B | 23760716                 | 20.90                 | 63222              |
| moDC, 18h | 18h IL4/GM-CSF             | PU.1 ChIP | donor B | 31792250                 | 29.13                 | 116428             |
| moDC, 3d  | 3d IL4/GM-CSF              | PU.1 ChIP | donor B | 36297448                 | 20.79                 | 94119              |
| moDC, 7d  | 7d IL4/GM-CSF              | PU.1 ChIP | donor B | 28152341                 | 29.82                 | 120217             |
| moDC, 18h | 7d IL4/GM-CSF              | Input     | donor B | 23278914                 | –                     | –                  |
| moDC, 3d  | mock transfected           | PU.1 ChIP | donor C | 18020914                 | 12.19                 | 50923              |
| moDC, 3d  | FLAG-PU1 mRNA transfected  | FLAG-ChIP | donor C | 16818221                 | 17.54                 | 78335              |
| moDC, 3d  | mock transfected           | FLAG-ChIP | donor C | 17163313                 | –                     | –                  |
| moDC, 3d  | mock transfected           | PU.1 ChIP | donor D | 18276534                 | 28.11                 | 88888              |
| moDC, 3d  | FLAG-PU1 mRNA transfected  | FLAG-ChIP | donor D | 20022986                 | 12.86                 | 61269              |
| moDC, 3d  | mock transfected           | FLAG-ChIP | donor D | 20482638                 | –                     | –                  |
| moDC, 4d  | FLAG-EGR2 mRNA transfected | FLAG-ChIP | donor E | 26586788                 | 7.47                  | 35631              |
| moDC, 4d  | FLAG-IRF4 mRNA transfected | FLAG-ChIP | donor E | 30363269                 | 4.15                  | 23649              |
| moDC, 4d  | mock transfected           | FLAG-ChIP | donor E | 27110423                 | –                     | –                  |

<sup>1</sup>Unique reads after mapping to human reference genome GRCh38

<sup>2</sup>Fraction of reads in peaks (FRIP), determined by running HOMER's findPeaks program in "factor" mode using default parameters and the matching background (input)

<sup>3</sup>Number of peaks (determined by HOMER's findPeaks program with parameters "-style factor -tbp 1 -fdr 0.000001" and the matching background (input))

**Supplementary Table 6**  
**ATAC-sequencing data generated in this study**  
**(primary samples, accession IDs: EGAD00001006601, E-MTAB-9926)**

| Cell type | Sample               | donor   | Total read pairs <sup>1</sup> | FRIP (%) <sup>2</sup> | Peaks <sup>3</sup> |
|-----------|----------------------|---------|-------------------------------|-----------------------|--------------------|
| MO        | freshly isolated     | donor A | 84340866                      | 67.99                 | 107464             |
| MO        | freshly isolated     | donor B | 50560551                      | 9.37                  | 37334              |
| MO        | freshly isolated     | donor C | 47672453                      | 7.10                  | 33182              |
| moDC      | 7d IL4/GM-CSF        | donor A | 56211295                      | 44.20                 | 106392             |
| moDC      | 7d IL4/GM-CSF        | donor D | 31249221                      | 26.64                 | 63793              |
| moDC      | 7d IL4/GM-CSF        | donor E | 30279713                      | 62.43                 | 135146             |
| moDC      | 7d IL4/GM-CSF        | donor C | 43647739                      | 65.80                 | 129246             |
| moDC, 7d  | mock transfected     | donor F | 44527793                      | 37.72                 | 107380             |
| moDC, 7d  | siIRF4.a transfected | donor F | 45641296                      | 44.93                 | 102133             |
| moDC, 7d  | siCTRL transfected   | donor F | 39182782                      | 41.27                 | 100338             |
| moDC, 7d  | siIRF4.b transfected | donor F | 45408998                      | 39.99                 | 102326             |
| moDC, 7d  | siCTRL transfected   | donor G | 56908984                      | 40.28                 | 100159             |
| moDC, 7d  | siTET2 transfected   | donor G | 52024954                      | 56.30                 | 123990             |
| moDC, 7d  | siTET2 transfected   | donor F | 37912370                      | 22.03                 | 63629              |
| moDC, 7d  | siCTRL transfected   | donor H | 36169121                      | 45.03                 | 101940             |
| moDC, 7d  | siTET2 transfected   | donor H | 47103019                      | 64.81                 | 131017             |
| moDC, 4d  | mock transfected     | donor I | 31932091                      | 51.25                 | 88342              |
| moDC, 4d  | siEGR2.b transfected | donor I | 32898676                      | 14.77                 | 33549              |
| moDC, 4d  | siCTRL transfected   | donor J | 41349460                      | 24.23                 | 65089              |
| moDC, 4d  | siEGR2.b transfected | donor J | 36303964                      | 32.13                 | 63830              |
| MAC, 7d   | mock transfected     | donor K | 26373907                      | 47.58                 | 118312             |
| MAC, 7d   | siCTRL transfected   | donor K | 36248496                      | 39.26                 | 114793             |
| MAC, 7d   | mock transfected     | donor L | 38239563                      | 69.36                 | 147122             |
| MAC, 7d   | siCTRL transfected   | donor L | 36038751                      | 62.43                 | 137881             |

<sup>1</sup>Unique read pairs after mapping to human reference genome GRCh38

<sup>2</sup>Fraction of reads in peaks (FRIP), determined by running HOMER's findPeaks with parameters "-region -size 150"

<sup>3</sup>Number of peaks (determined by HOMER's findPeaks program with parameters "-region -size 250 -L 0 -F 5 -minDist 350 -fdr 0.00001 -ntagThreshold 10")

**Supplementary Table 7**  
**RNA-sequencing data generated in this study**  
**(primary samples, accession IDs: EGAD00001006604, E-MTAB-9929)**

| Cell type | Sample                         | Donor   | RIN <sup>1</sup> | Total reads | Uniquely Mapped Reads (%) <sup>2</sup> |
|-----------|--------------------------------|---------|------------------|-------------|----------------------------------------|
| MO        | freshly isolated               | donor A | 9.7              | 29843300    | 80.27                                  |
| MO        | freshly isolated               | donor B | 9.3              | 53456066    | 85.60                                  |
| MO        | freshly isolated               | donor C | 9.7              | 53849809    | 90.15                                  |
| MO        | freshly isolated               | donor D | 9.7              | 58503430    | 87.51                                  |
| MAC, 7d   | mock (electroporation control) | donor E | 9.9              | 40479286    | 90.04                                  |
| MAC, 7d   | mock (electroporation control) | donor F | 9.4              | 42061245    | 91.22                                  |
| MAC, 7d   | mock (electroporation control) | donor G | 9.5              | 43159887    | 49.02                                  |
| moDC, 7d  | untransfected control          | donor A | 9.1              | 36683742    | 81.90                                  |
| moDC, 7d  | untransfected control          | donor B | 9.1              | 41980337    | 85.39                                  |
| moDC, 7d  | untransfected control          | donor C | 7.4              | 63087941    | 91.10                                  |
| moDC, 7d  | untransfected control          | donor D | 9.1              | 56461592    | 85.88                                  |
| moDC, 7d  | mock (electroporation control) | donor B | 9.2              | 39468070    | 88.30                                  |
| moDC, 7d  | mock (electroporation control) | donor C | 8.0              | 64269589    | 89.04                                  |
| moDC, 7d  | mock (electroporation control) | donor D | 9.1              | 60379539    | 91.60                                  |
| moDC, 7d  | mock (electroporation control) | donor E | 9.0              | 42986973    | 82.06                                  |
| moDC, 7d  | mock (electroporation control) | donor F | 9.6              | 37261048    | 90.16                                  |
| moDC, 7d  | mock (electroporation control) | donor G | 9.2              | 46745415    | 68.07                                  |
| moDC, 7d  | siCTRL transfected             | donor A | 9.1              | 33388475    | 85.31                                  |
| moDC, 7d  | siCTRL transfected             | donor B | 9.1              | 44102490    | 87.33                                  |
| moDC, 7d  | siCTRL transfected             | donor C | 8.8              | 50227965    | 89.83                                  |
| moDC, 7d  | siCTRL transfected             | donor D | 9.2              | 67212155    | 89.56                                  |
| moDC, 7d  | siEGR2.a transfected           | donor A | 8.6              | 29770618    | 87.30                                  |
| moDC, 7d  | siEGR2.a transfected           | donor B | 8.8              | 48142095    | 86.51                                  |
| moDC, 7d  | siEGR2.a transfected           | donor C | 8.7              | 44528953    | 92.09                                  |
| moDC, 7d  | siEGR2.a transfected           | donor D | 9.3              | 55868602    | 91.64                                  |
| moDC, 7d  | siEGR2.b transfected           | donor A | 8.8              | 36851394    | 85.88                                  |
| moDC, 7d  | siEGR2.b transfected           | donor B | 7.9              | 42329027    | 88.55                                  |
| moDC, 7d  | siEGR2.b transfected           | donor C | 8.8              | 43784117    | 91.74                                  |
| moDC, 7d  | siEGR2.b transfected           | donor D | 9.2              | 54757829    | 93.31                                  |
| moDC, 7d  | siIRF4.a transfected           | donor A | 9.4              | 38746171    | 88.58                                  |
| moDC, 7d  | siIRF4.a transfected           | donor B | 8.8              | 35650719    | 87.25                                  |
| moDC, 7d  | siIRF4.a transfected           | donor C | 8.5              | 57209689    | 91.65                                  |
| moDC, 7d  | siIRF4.a transfected           | donor D | 8.6              | 54117254    | 87.96                                  |
| moDC, 7d  | siIRF4.b transfected           | donor A | 9.2              | 37606950    | 85.59                                  |
| moDC, 7d  | siIRF4.b transfected           | donor B | 9.3              | 48410363    | 85.66                                  |
| moDC, 7d  | siIRF4.b transfected           | donor C | 8.6              | 58189847    | 91.58                                  |
| moDC, 7d  | siIRF4.b transfected           | donor D | 8.9              | 66757445    | 87.89                                  |
| moDC, 7d  | siTET2 transfected             | donor B | 9.1              | 42284779    | 87.52                                  |
| moDC, 7d  | siTET2 transfected             | donor C | 8.0              | 70927043    | 92.07                                  |
| moDC, 7d  | siTET2 transfected             | donor D | 9.2              | 57001936    | 89.73                                  |

<sup>1</sup>RNA-Integrity Index (RIN) as measured using the TapeStation (Agilent)

<sup>2</sup>percentage of unique sequences after mapping to GRCh38

**Supplementary Table 8**  
**Published WGBS-sequencing data used in this study**

| Cell type                       | Accession number | Data                                                                         | CpGs     | Reference                                                                           |
|---------------------------------|------------------|------------------------------------------------------------------------------|----------|-------------------------------------------------------------------------------------|
| moDC                            | GSM1565940       | methylation levels for each covered CpG (hg19) converted to bedGraph         | 24617968 | 2                                                                                   |
| moDC                            | GSM1565942       | methylation levels for each covered CpG (hg19) converted to bedGraph         | 23551701 | 2                                                                                   |
| moDC                            | GSM1565944       | methylation levels for each covered CpG (hg19) converted to bedGraph         | 24445760 | 2                                                                                   |
| moDC                            | GSM1565946       | methylation levels for each covered CpG (hg19) converted to bedGraph         | 24479420 | 2                                                                                   |
| moDC                            | GSM1565948       | methylation levels for each covered CpG (hg19) converted to bedGraph         | 24427703 | 2                                                                                   |
| moDC                            | GSM1565950       | methylation levels for each covered CpG (hg19) converted to bedGraph         | 24560919 | 2                                                                                   |
| CD14+CD16- MO from venous blood | EGAX00001086967  | methylation levels for each covered CpG (hg19), bigWig converted to bedGraph | 22667869 | <a href="http://dcc.blueprint-epigenome.eu/">http://dcc.blueprint-epigenome.eu/</a> |
| CD14+CD16- MO from venous blood | EGAX00001086968  | methylation levels for each covered CpG (hg19), bigWig converted to bedGraph | 23768442 | <a href="http://dcc.blueprint-epigenome.eu/">http://dcc.blueprint-epigenome.eu/</a> |
| CD14+CD16- MO from venous blood | EGAX00001086970  | methylation levels for each covered CpG (hg19), bigWig converted to bedGraph | 23652501 | <a href="http://dcc.blueprint-epigenome.eu/">http://dcc.blueprint-epigenome.eu/</a> |
| CD14+CD16- MO from venous blood | EGAX00001097774  | methylation levels for each covered CpG (hg19), bigWig converted to bedGraph | 24145754 | <a href="http://dcc.blueprint-epigenome.eu/">http://dcc.blueprint-epigenome.eu/</a> |
| CD38- B cells                   | ERS214672        | methylation levels for each covered CpG (hg38), bigWig converted to bedGraph | 24601631 | <a href="https://epigenomesportal.ca">https://epigenomesportal.ca</a>               |
| CD38- B cells                   | ERS214675        | methylation levels for each covered CpG (hg38), bigWig converted to bedGraph | 24932472 | <a href="https://epigenomesportal.ca">https://epigenomesportal.ca</a>               |
| CD38- B cells                   | ERS222266        | methylation levels for each covered CpG (hg38), bigWig converted to bedGraph | 23878548 | <a href="https://epigenomesportal.ca">https://epigenomesportal.ca</a>               |
| CD38- B cells                   | ERS523625        | methylation levels for each covered CpG (hg38), bigWig converted to bedGraph | 23633379 | <a href="https://epigenomesportal.ca">https://epigenomesportal.ca</a>               |
| CD8+ T cells                    | ERS214674        | methylation levels for each covered CpG (hg38), bigWig converted to bedGraph | 25029123 | <a href="https://epigenomesportal.ca">https://epigenomesportal.ca</a>               |
| CD8+ T cells                    | ERS222241        | methylation levels for each covered CpG (hg38), bigWig converted to bedGraph | 24488031 | <a href="https://epigenomesportal.ca">https://epigenomesportal.ca</a>               |
| CD8+ T cells                    | ERS317233        | methylation levels for each covered CpG (hg38), bigWig converted to bedGraph | 25482590 | <a href="https://epigenomesportal.ca">https://epigenomesportal.ca</a>               |
| CD8+ T cells                    | ERS433791        | methylation levels for each covered CpG (hg38), bigWig converted to bedGraph | 22165393 | <a href="https://epigenomesportal.ca">https://epigenomesportal.ca</a>               |
| NK cells                        | ERS222243        | methylation levels for each covered CpG (hg38), bigWig converted to bedGraph | 24729720 | <a href="https://epigenomesportal.ca">https://epigenomesportal.ca</a>               |
| NK cells                        | ERS317235        | methylation levels for each covered CpG (hg38), bigWig converted to bedGraph | 25327131 | <a href="https://epigenomesportal.ca">https://epigenomesportal.ca</a>               |
| NK cells                        | ERS763560        | methylation levels for each covered CpG (hg38), bigWig converted to bedGraph | 26961816 | <a href="https://epigenomesportal.ca">https://epigenomesportal.ca</a>               |
| Neutrophils                     | ERS208313        | methylation levels for each covered CpG (hg38), bigWig converted to bedGraph | 26244136 | <a href="https://epigenomesportal.ca">https://epigenomesportal.ca</a>               |
| Neutrophils                     | ERS227748        | methylation levels for each covered CpG (hg38), bigWig converted to bedGraph | 24960155 | <a href="https://epigenomesportal.ca">https://epigenomesportal.ca</a>               |
| Neutrophils                     | ERS227749        | methylation levels for each covered CpG (hg38), bigWig converted to bedGraph | 26025313 | <a href="https://epigenomesportal.ca">https://epigenomesportal.ca</a>               |
| Neutrophils                     | ERS661057        | methylation levels for each covered CpG (hg38), bigWig converted to bedGraph | 25195761 | <a href="https://epigenomesportal.ca">https://epigenomesportal.ca</a>               |
| Neutrophils                     | ERS661059        | methylation levels for each covered CpG (hg38), bigWig converted to bedGraph | 23925309 | <a href="https://epigenomesportal.ca">https://epigenomesportal.ca</a>               |
| Neutrophils                     | ERS661060        | methylation levels for each covered CpG (hg38), bigWig converted to bedGraph | 24906321 | <a href="https://epigenomesportal.ca">https://epigenomesportal.ca</a>               |
| Hepatocytes                     | IHECRE00001879.2 | methylation levels for each covered CpG (hg38), bigWig converted to bedGraph | 21708615 | <a href="https://epigenomesportal.ca">https://epigenomesportal.ca</a>               |
| Hepatocytes                     | IHECRE00001876.2 | methylation levels for each covered CpG (hg38), bigWig converted to bedGraph | 22059276 | <a href="https://epigenomesportal.ca">https://epigenomesportal.ca</a>               |
| Hepatocytes                     | IHECRE00001878.2 | methylation levels for each covered CpG (hg38), bigWig converted to bedGraph | 21382628 | <a href="https://epigenomesportal.ca">https://epigenomesportal.ca</a>               |
| Hepatocytes                     | IHECRE00001877.2 | methylation levels for each covered CpG (hg38), bigWig converted to bedGraph | 22177806 | <a href="https://epigenomesportal.ca">https://epigenomesportal.ca</a>               |
| CD34+ Progenitor                | ERS337604        | methylation levels for each covered CpG (hg38), bigWig converted to bedGraph | 25664889 | <a href="https://epigenomesportal.ca">https://epigenomesportal.ca</a>               |
| CD34+ Progenitor                | ERS666926        | methylation levels for each covered CpG (hg38), bigWig converted to bedGraph | 25790225 | <a href="https://epigenomesportal.ca">https://epigenomesportal.ca</a>               |

**Supplementary Table 9**  
**Published ChIP-sequencing data used in this study**

| Cell type | Sample                    | IP          | Accession number                           | Total reads <sup>1</sup> | FRIP (%) <sup>2</sup> | Peaks <sup>3</sup> | Reference |
|-----------|---------------------------|-------------|--------------------------------------------|--------------------------|-----------------------|--------------------|-----------|
| MO        | freshly isolated          | CEBPB ChIP  | SRR333633                                  | 5489459                  | 4.45                  | 13275              | 3         |
| MAC       | 7d culture in 2% AB serum | CEBPB ChIP  | SRR333649, SRR333650, SRR333651, SRR333652 | 14793649                 | 14.01                 | 67734              | 3         |
| MO/MAC    | 7d IL4/GM-CSF             | IgG control | SRR333634, SRR333635, SRR333636            | 13754210                 | –                     | –                  | 3         |
| Liver     |                           | CEBPA ChIP  | ERR235748, ERR235729, ERR235723, ERR235766 | 37071639                 | 12.76                 | 72762              | 4         |
| Liver     |                           | Input       | ERR235788, ERR235759                       | 30055419                 | –                     | –                  | 4         |

<sup>1</sup>Unique reads after mapping to human reference genome GRCh38

<sup>2</sup>Fraction of reads in peaks (FRIP), determined by running HOMER's findPeaks program in "factor" mode using default parameters and the matching background (input)

<sup>3</sup>Number of peaks (determined by HOMER's findPeaks program in "factor" mode using default parameters and the matching background (input))



**Supplementary Table 10**  
**Published ATAC-seq data used in this study**

| <b>Cell type</b> | <b>Accession number</b> | <b>Total read pairs</b> | <b>FRIP (%)</b> | <b>Peaks</b> | <b>Reference</b> |
|------------------|-------------------------|-------------------------|-----------------|--------------|------------------|
| MO               | SRR2920543              | 63854968                | 33.86           | 63647        | 5                |
| MO               | SRR2920487              | 21181211                | 21.25           | 24324        | 5                |
| MO               | SRR2920475              | 9713700                 | 29.68           | 36278        | 5                |
| moDC             | SRR1725732              | 204024037               | 41.00           | 285569       | 2                |

### Supplementary References

1. Minderjahn, J. *et al.* Mechanisms governing the pioneering and redistribution capabilities of the non-classical pioneer PU.1. *Nature communications* **11**, 402; 10.1038/s41467-019-13960-2 (2020).
2. Pacis, A. *et al.* Bacterial infection remodels the DNA methylation landscape of human dendritic cells. *Genome research* **25**, 1801–1811; 10.1101/gr.192005.115 (2015).
3. Pham, T.-H. *et al.* Dynamic epigenetic enhancer signatures reveal key transcription factors associated with monocytic differentiation states. *Blood* **119**, e161-71; 10.1182/blood-2012-01-402453 (2012).
4. Ballester, B. *et al.* Multi-species, multi-transcription factor binding highlights conserved control of tissue-specific biological pathways. *eLife* **3**, e02626; 10.7554/eLife.02626 (2014).
5. Corces, M. R. *et al.* Lineage-specific and single-cell chromatin accessibility charts human hematopoiesis and leukemia evolution. *Nature genetics* **48**, 1193–1203; 10.1038/ng.3646 (2016).
